# Supplementary material for: Differential Leukocyte and Platelet Profiles in Distinct Models of Traumatic Brain Injury
Source: PubMed Central journal article supplement (PMC7996744; doi:10.3390/cells10030500), 2021-02-26
Supplement: cells-10-00500-s001.pdf [file cells-10-00500-s001.pdf]

# Differential Leukocyte and Platelet Profiles in Distinct Models of Traumatic Brain Injury

Brad Hubbard <sup>1,2,3,4</sup>, Meenakshi Banerjee <sup>5,†</sup>, Hemendra Vekaria <sup>1</sup>, Kanakanagavalli Shravani Prakhya <sup>5</sup>, Smita Joshi <sup>4,5</sup>, Qing Jun Wang <sup>6</sup>, Kathryn E. Saatman <sup>1,2</sup>, Sidney W. Whiteheart <sup>4,5</sup>, Patrick G. Sullivan <sup>1,3,4,\*</sup>

## Supplementary Materials:

This replication study was performed using the Seahorse XFe24, therefore utilizing more platelets than with the Seahorse XFe96. This is an independent replication demonstrating increased RCR at 24h post-CCI in mice.

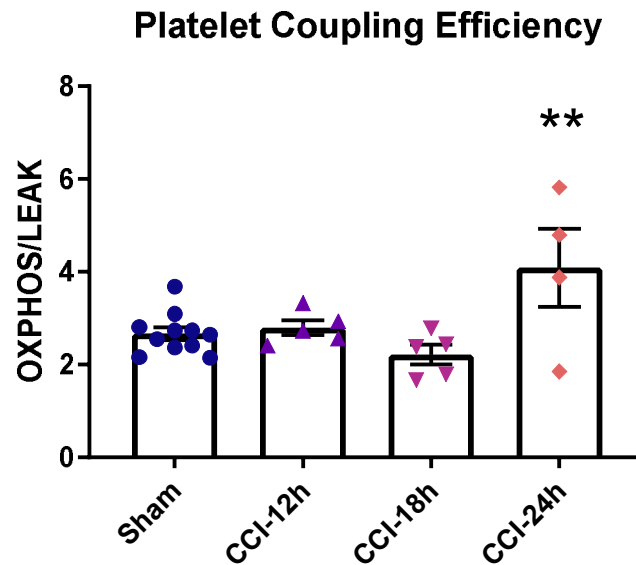

**Figure S1.** Dynamic changes in platelet coupling efficiency acutely following contusion brain injury. Mice received either sham injury or severe CCI followed by euthanasia at either 12, 18 or 24 h post-injury. Isolated platelets underwent respirometry using the Seahorse XFe24. Platelet coupling efficiency was increased 24 h after CCI compared to sham.  $t=2.656$ ;  $*p=0.012$ . There was a significant increase in platelet coupling efficiency 24 h after CCI compared to sham.  $F_{(4, 25)} = 4.349$ ;  $**p=0.002$  compared to sham.  $n = 4-11$ /group, Mean  $\pm$  SEM.

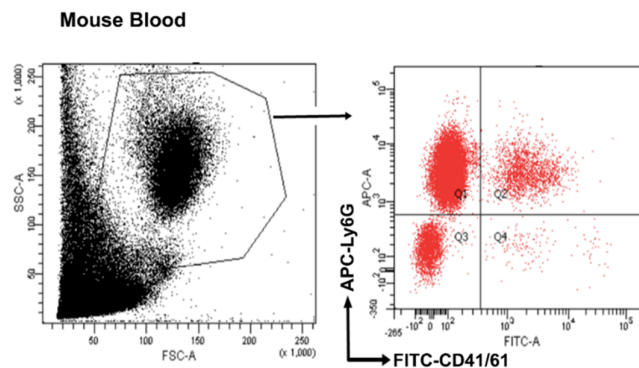

**Figure S2.** Schematic for platelet-neutrophil aggregates in whole mouse blood. Whole mouse blood was incubated with FITC-anti-CD41/61 (for platelets) and APC-anti- Ly6G (for neutrophils) antibodies for 30 min at RT. Using BD LSRII™ flow cytometer, double-positive platelet-neutrophil

aggregates were acquired by gating around 50,000 granulocytes (marked by polyhedral) and dot-plots were created from that (denoted by arrow). Quadrants were drawn to show single-positive and double-positive CD41/61<sup>+</sup>-Ly6G<sup>+</sup> events. Data were then analyzed using the FlowJo software (v7.6.5) and plotted as percentages of events in each quadrant over total granulocytes.
